# Supplementary material
Source: Springer Nature journal article supplement (https://www.springermedizin.de/resource/supplementary/12883_2014_1032_MOESM1_ESM.pdf/9456392)

## Impact on Participation and Autonomy

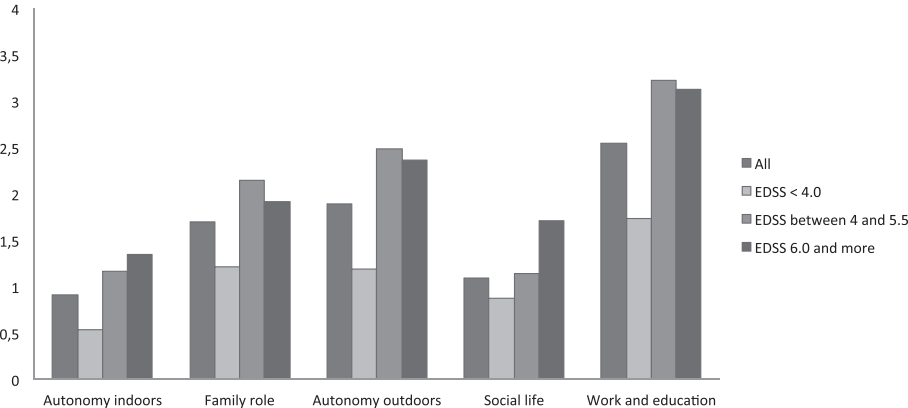

Supplement: MOESM1 [file 9456392]
